# Supplementary material for: The Relationship between Emotional Intelligence, Obesity and Eating Disorder in Children and Adolescents: A Systematic Mapping Review
Source: PubMed Central journal article supplement (PMC7923289; doi:10.3390/ijerph18042054), 2021-02-20
Supplement: ijerph-18-02054-s001.pdf [file ijerph-18-02054-s001.pdf]

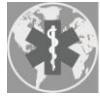

**Supplementary Table S1.** Results of the methodological quality assessment the Appraisal tool for Cross-Sectional Studies (AXIS).

**Amado Alonso, 2020 Cuesta-Zamora, 2018 Markey, 2007 Peres, 2017 Pollatos, 2020 Zavala Berbena, 2018 Li, 2019 Li, 2018 Wong, 2014**

| <b>Study design</b>     |                                                                                                                                                       |   |   |   |   |   |   |   |   |   |
|-------------------------|-------------------------------------------------------------------------------------------------------------------------------------------------------|---|---|---|---|---|---|---|---|---|
| 1                       | Were the aims/objectives of the study clear?                                                                                                          | + | + | + | + | + | + | + | + | + |
| 2                       | Was the study design appropriate for the stated aim(s)?                                                                                               | + | + | - | + | + | + | - | - | + |
| <b>Selection bias</b>   |                                                                                                                                                       |   |   |   |   |   |   |   |   |   |
| 3                       | Was the sample size justified?                                                                                                                        | + | + | + | - | + | - | - | - | + |
| 4                       | Was the target/reference population clearly defined? (Is it clear who the research was about?)                                                        | + | + | - | + | + | + | + | + | + |
| 5                       | Was the sample frame taken from an appropriate population base so that it closely represented the target/reference population under investigation?    | + | + | - | - | + | + | + | + | + |
| 6                       | Was the selection process likely to select subjects/participants that were representative of the target/reference population under investigation?     | + | - | - | - | + | + | + | + | + |
| 7                       | Were measures undertaken to address and categorise non-responders?                                                                                    | ? | + | ? | + | + | ? | - | - | + |
| <b>Measurement bias</b> |                                                                                                                                                       |   |   |   |   |   |   |   |   |   |
| 8                       | Were the risk factor and outcome variables measured appropriate to the aims of the study?                                                             | + | + | + | + | + | + | + | + | + |
| 9                       | Were the risk factor and outcome variables measured correctly using instruments/measurements that had been trialled, piloted or published previously? | + | + | + | + | + | + | + | + | + |
| <b>Reporting bias</b>   |                                                                                                                                                       |   |   |   |   |   |   |   |   |   |
| 10                      | Is it clear what was used to determined statistical significance and/or precision estimates? (e.g. p-values, confidence intervals)                    | + | + | + | + | + | + | + | + | + |
| 11                      | Were the methods (including statistical methods) sufficiently described to enable them to be repeated?                                                | + | + | + | + | + | + | + | + | + |
| 12                      | Were the basic data adequately described?                                                                                                             | + | + | + | + | + | + | - | + | + |
| 13                      | Does the response rate raise concerns about non-response bias?                                                                                        | ? | - | + | ? | + | ? | + | + | + |
| 14                      | If appropriate, was information about non-responders described?                                                                                       | ? | + | + | ? | + | ? | + | + | + |
| 15                      | Were the results internally consistent?                                                                                                               | + | + | + | + | + | + | + | + | + |
| 16                      | Were the results presented for all the analyses described in the methods?                                                                             | + | + | + | - | + | + | + | + | + |

| <b>Confounding</b> |                                                                                                                     |   |   |   |   |   |   |   |   |   |
|--------------------|---------------------------------------------------------------------------------------------------------------------|---|---|---|---|---|---|---|---|---|
| 17                 | Were the authors' discussions and conclusions justified by the results?                                             | + | + | + | - | + | + | + | + | - |
| 18                 | Were the limitations of the study discussed?                                                                        | + | + | + | + | + | + | + | + | + |
| 19                 | Were there any funding sources or conflicts of interest that may affect the authors' interpretation of the results? | + | + | + | + | + | + | + | + | + |
| 20                 | Was ethical approval or consent of participants attained?                                                           | + | + | + | + | + | + | + | + | + |

Note. Plus signs (+) indicate absence of risk of bias, minus signs (-) indicate potential risk of bias and question marks (?) indicate absence of information to assess the AXIS item.
